# Supplementary material for: Deep Proteome Analysis of Cerebrospinal Fluid from Pediatric Patients with Central Nervous System Cancer
Source: PubMed Central journal article supplement — J Proteome Res. 2024 Oct 9;23(11):5048–63. doi: 10.1021/acs.jproteome.4c00471 (PMC11536435; doi:10.1021/acs.jproteome.4c00471), 2024-10-09
Supplement: pr4c00471_si_001.pdf [file pr4c00471_si_001.pdf]

Supporting Information. Deep proteome analysis of cerebrospinal fluid from pediatric patients with central nervous system cancer. Christian Mirian\*, Ole Østergaard, Maria Thastrup, Signe Modvig, Jon Foss-Skiftesvik, Jane Skjøth-Rasmussen, Marianne Berntsen, Josefine Britze, Alex Christian Yde Nielsen, René Mathiasen, Kjeld Schmiegelow and Jesper Velgaard Olsen. Table showing fractions categorized into highest to lowest MS2 intensity of previously reported biomarkers.

| Official_gene_symbol | Fraction_With_Highest_MS2 | Fraction_With_Second_Highest_MS2 | Fraction_With_Third_Highest_MS2 | Fraction_With_Fourth_Highest_MS2 |
|----------------------|---------------------------|----------------------------------|---------------------------------|----------------------------------|
| ALDOC                | 120K                      | R                                | Sr                              | 20K                              |
| APOA1                | 120K                      | R                                | Sr                              | 20K                              |
| CAT                  | 120K                      | R                                | Sr                              | 20K                              |
| CKB                  | 120K                      | 20K                              | R                               | Sr                               |
| CLSTN1               | 120K                      | Sr                               | R                               | 20K                              |
| COL18A1              | 120K                      | R                                | Sr                              | 20K                              |
| CSPG5                | R                         | 120K                             |                                 |                                  |
| GFAP                 | 120K                      | 20K                              | Sr                              | R                                |
| HIST1H4A             | 120K                      | 20K                              | R                               | Sr                               |
| ITIH4                | 120K                      | R                                | Sr                              | 20K                              |
| MACF1                | 120K                      | R                                | Sr                              |                                  |
| MMP2                 | 120K                      | R                                | Sr                              | 20K                              |
| PLG                  | 120K                      | R                                | Sr                              | 20K                              |
| PRNP                 | Sr                        | R                                | 120K                            | 20K                              |
| S100A9               | 120K                      | Sr                               | 20K                             | R                                |
| SAA1                 | 120K                      | 20K                              | R                               | Sr                               |
| SERPINA1             | Sr                        | R                                | 120K                            | 20K                              |
| SPARCL1              | R                         | Sr                               | 120K                            | 20K                              |
| TF                   | R                         | Sr                               | 120K                            | 20K                              |
| TPI1                 | 20K                       | Sr                               | R                               | 120K                             |
| TUBB                 | 20K                       | 120K                             | R                               | Sr                               |
| YWHAG                | 20K                       | Sr                               | R                               | 120K                             |
